# Supplementary material for: Fubrick tea attenuates high-fat diet induced fat deposition and metabolic disorder by regulating gut microbiota and caffeine metabolism
Source: Royal Society of Chemistry journal article supplement (doi:10.1039/d0fo01282c), 2020-01-01

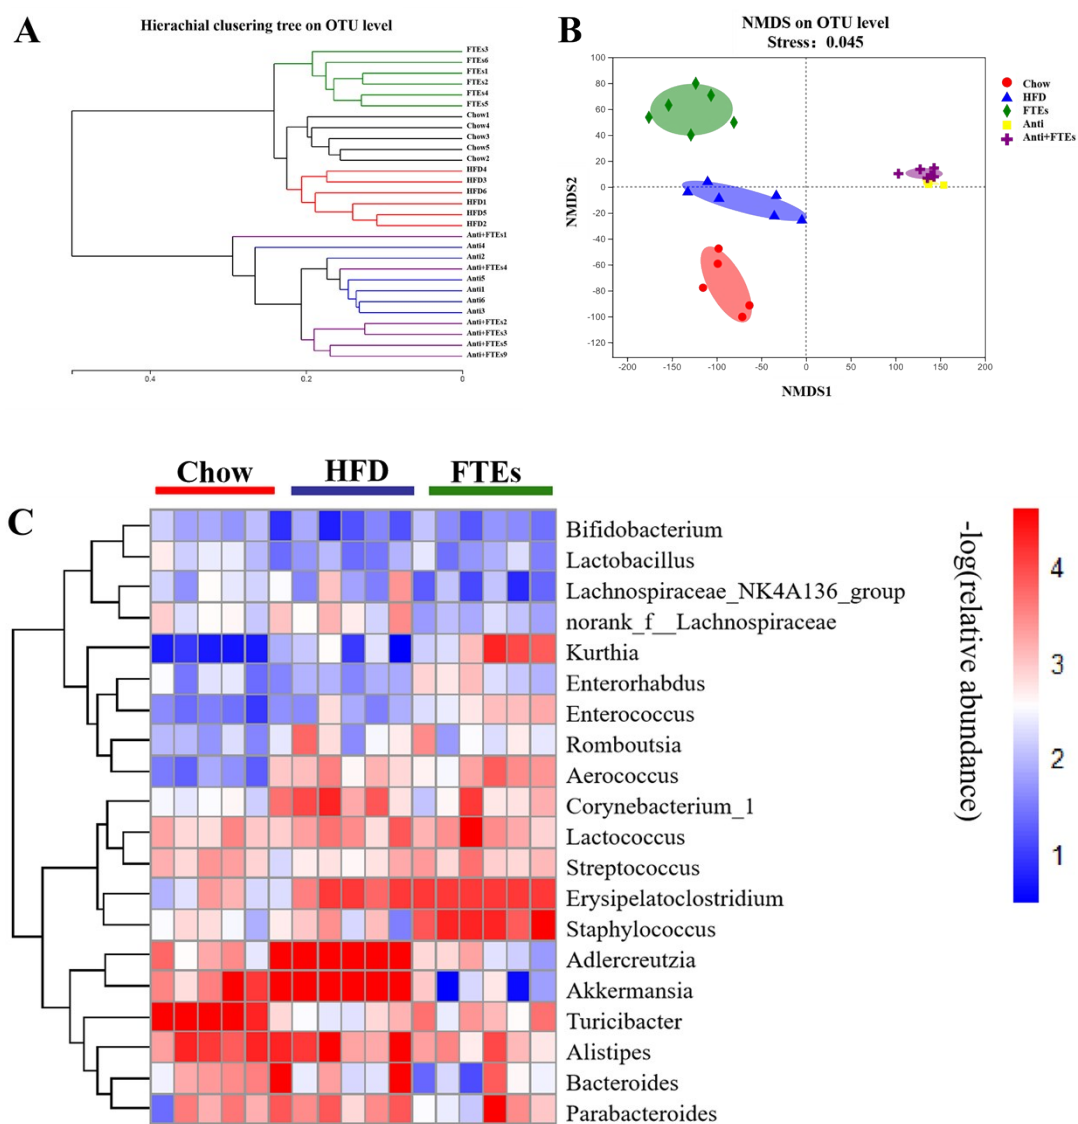

**Table S1. Composition of the animal diet.**

| Ingredients      | Chow diet<br>(D12450H) | High-fat diet<br>(D12451) |
|------------------|------------------------|---------------------------|
| Casein           | 18.96%                 | 23.31%                    |
| L-Cystine        | 0.28%                  | 0.35%                     |
| Corn Starch      | 42.86%                 | 8.48%                     |
| Maltodextrin 10  | 7.11%                  | 11.65%                    |
| Sucrose          | 16.38%                 | 20.14%                    |
| Cellulose, BW200 | 0.47%                  | 5.83%                     |
| Soybean oil      | 2.37%                  | 2.91%                     |
| Lard             | 1.90%                  | 20.68%                    |
| Mineral Mix      | 0.95%                  | 1.17%                     |

---

|                                      |       |       |
|--------------------------------------|-------|-------|
| Vitamin Mix                          | 0.95% | 1.17% |
| Choline Bitartrate                   | 0.19% | 0.23% |
| DiCalcium Phosphate                  | 1.23% | 1.57% |
| Calcium Crabonate                    | 0.52% | 0.64% |
| Potassium Citrate,1 H <sub>2</sub> O | 1.56% | 1.92% |
| Total calories (kcal/g)              | 3.85  | 4.73  |

---

**Table S2. The relative abundance of gut microbiota in genus level between HFD and Anti groups.**

| Name                                                      | HFD (%)        | Anti (%)          |
|-----------------------------------------------------------|----------------|-------------------|
| <i>p__Bacteroidetes, g__Alistipes</i>                     | 0.0224±0.0277  | 0**               |
| <i>p__Firmicutes, g__Erysipelatoclostridium</i>           | 0.1012±0.2211  | 0*                |
| <i>p__Firmicutes, g__Lachnospiraceae_NK4A136_group</i>    | 1.2911±1.3494  | 0.0013±0.0032**   |
| <i>p__Firmicutes, g__Enterococcus</i>                     | 1.7343±0.9913  | 0.0018±0.0022**   |
| <i>p__Actinobacteria, g__Enterorhabdus</i>                | 1.7484±0.7628  | 0**               |
| <i>p__Firmicutes, g__Lactobacillus</i>                    | 2.7300±1.5076  | 0.0189±0.0425**   |
| <i>p__Firmicutes, g__Kurthia</i>                          | 7.8084±13.0511 | 0**               |
| <i>p__Actinobacteria, g__Bifidobacterium</i>              | 8.2843±6.4787  | 0.0009±0.0022**   |
| <i>p__Firmicutes, g__Faecalibaculum</i>                   | 18.1254±4.6443 | 0.0004±0.0011     |
| <i>p__Bacteroidetes, g__unclassified_o__Bacteroidales</i> | 0              | 0.0150±0.0129**   |
| <i>p__Proteobacteria, g__Parasutterella</i>               | 0.0004±0.0011  | 14.8707±6.2449**  |
| <i>p__Proteobacteria, g__Escherichia-Shigella</i>         | 0.0026±0.0024  | 8.6522±5.4739**   |
| <i>p__Proteobacteria, g__Citrobacter</i>                  | 0.0040±0.0040  | 27.1351±6.8712**  |
| <i>p__Proteobacteria, g__Klebsiella</i>                   | 0.0040±0.0072  | 3.6478±2.7194**   |
| <i>p__Bacteroidetes, g__Parabacteroides</i>               | 0.0374±0.0538  | 41.9350±14.2825** |

Data were expressed as mean ± SD, and statistical analysis by Wilcoxon rank sum test, \* $p < 0.05$ , \*\* $p < 0.01$ .

## Supplementary Figure Captions

**Figure S1. Effect of FTES on obese mice.** (A-C) The weight of epididymis fat, mesenteric fat and retroperitoneal fat. (D-E) Concentrations of LDL-C, HDL-C in serum. (F) The level of blood glycemia in oral glucose tolerance test. Data were expressed as mean  $\pm$  SD, and statistically analyzed by One-way ANOVA,  $*p < 0.05$ ,  $**p < 0.01$ ,  $***p < 0.001$ ; ns, not significant.

**Figure S2. Effect of FTES on antibiotic treated mice.** (A-C) The weight of epididymis fat, mesenteric fat and retroperitoneal fat. (D-E) Concentrations of LDL-C, HDL-C in serum. (F) The level of blood glycemia in oral glucose tolerance test. Data were expressed as mean  $\pm$  SD, and statistically analyzed by Student's t test,  $*p < 0.05$ ,  $**p < 0.01$ ,  $***p < 0.001$ ; ns, not significant.

**Figure S3.** (A) Food intake, (B) water intake, (C) OTU rank-abundance curves, (D) Partial least squares-discriminate analysis (PLS-DA) on OUT level. Data were expressed as mean  $\pm$  SD, and statistically analyzed by One-way ANOVA. Different letters a, b represent significant difference,  $p < 0.05$ .

**Figure S4.** (A) Hierarchical cluster analysis by Spearson-Approx method. (B) Non-metric multidimensional scaling (NMDS) on OUT level. (C) The heatmap of differential genera among Chow, HFD and FTES groups, which were analysed by the Wilcoxon rank sum test ( $p < 0.05$ ).

**Figure S5. Fecal transplantation improved lipid metabolism in high-fat diet fed mice.** (A) The weight of liver, mesenteric fat and retroperitoneal fat. (B) Serum concentrations of TC, LDL-C, HDL-C. (C) Food and water intake. (D) Alpha diversity was presented as the index of Chao, Shannon. Data were expressed as mean  $\pm$  SD, and statistically analyzed by One-way ANOVA,  $*p < 0.05$ ,  $**p < 0.01$ ,  $***p < 0.001$ ; ns, not significant.

**Figure S6.** Heatmap showing significantly different metabolites between the HFD group and Chow group or FTES group based on Student's t test ( $p < 0.05$ ).

**Figure S7.** Differential metabolites and enriched metabolic pathways after treated by FTES in negative ion model. (A) Heatmap showing significantly different metabolites between the HFD group and FTES group based on Student's t test. (B) Metabolome view maps of the significantly different metabolites-related metabolic pathways between the HFD group FTES group. Pathway impact for topology analysis and  $p$ -value for enrichment analysis were performed using MetaboAnalyst 4.0. The size and color of each circle represent the pathway impact value and  $p$ -value, respectively.

**Figure S1.**

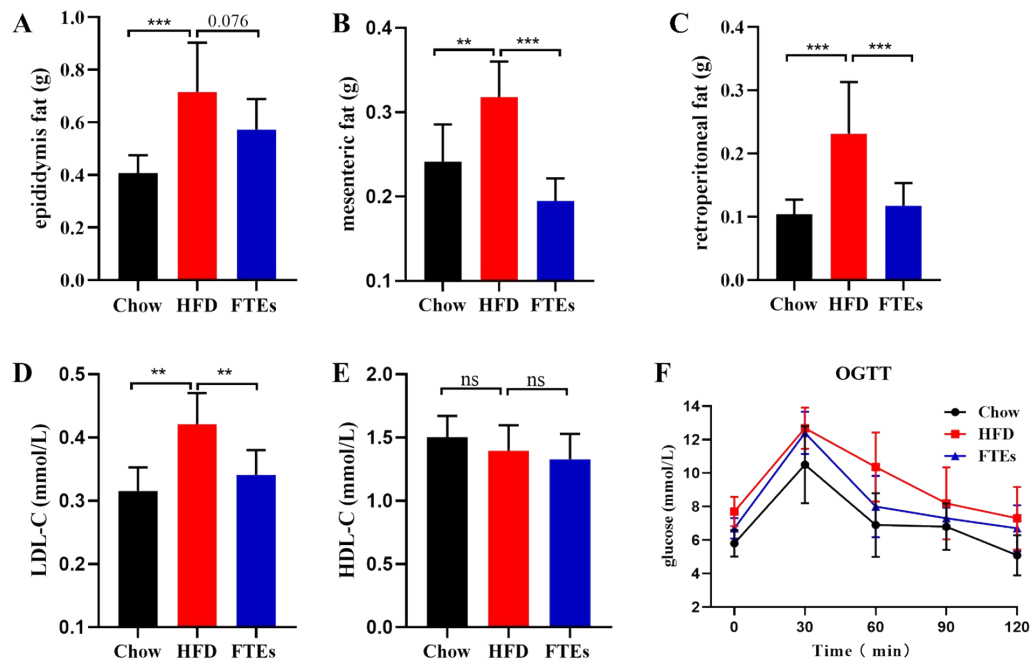

Figure S2.

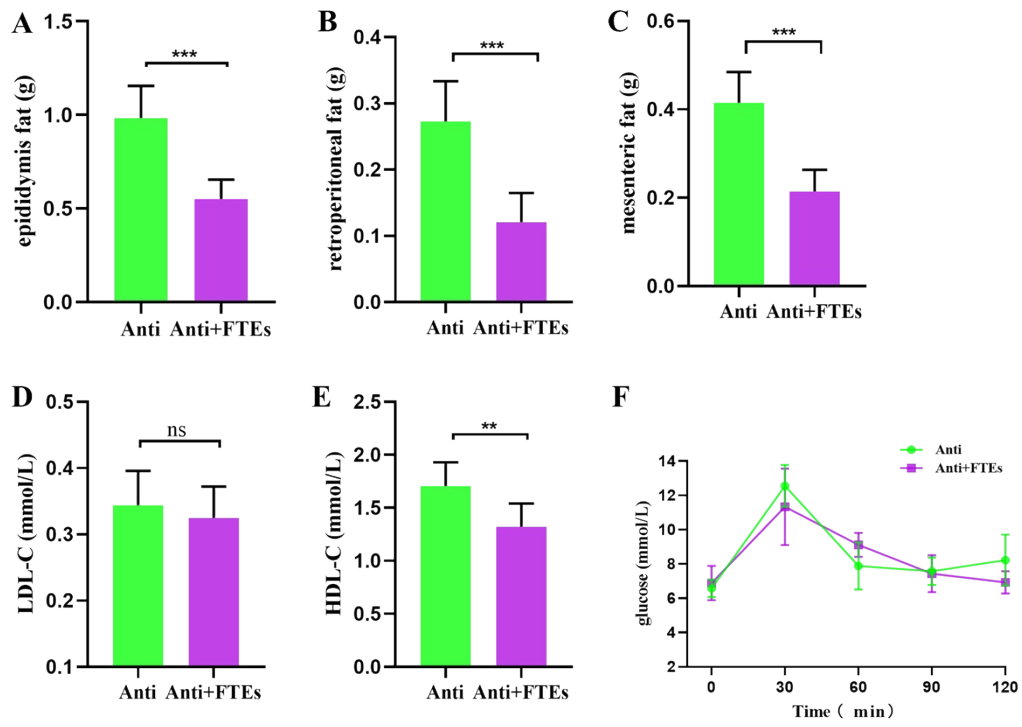

Figure S3.

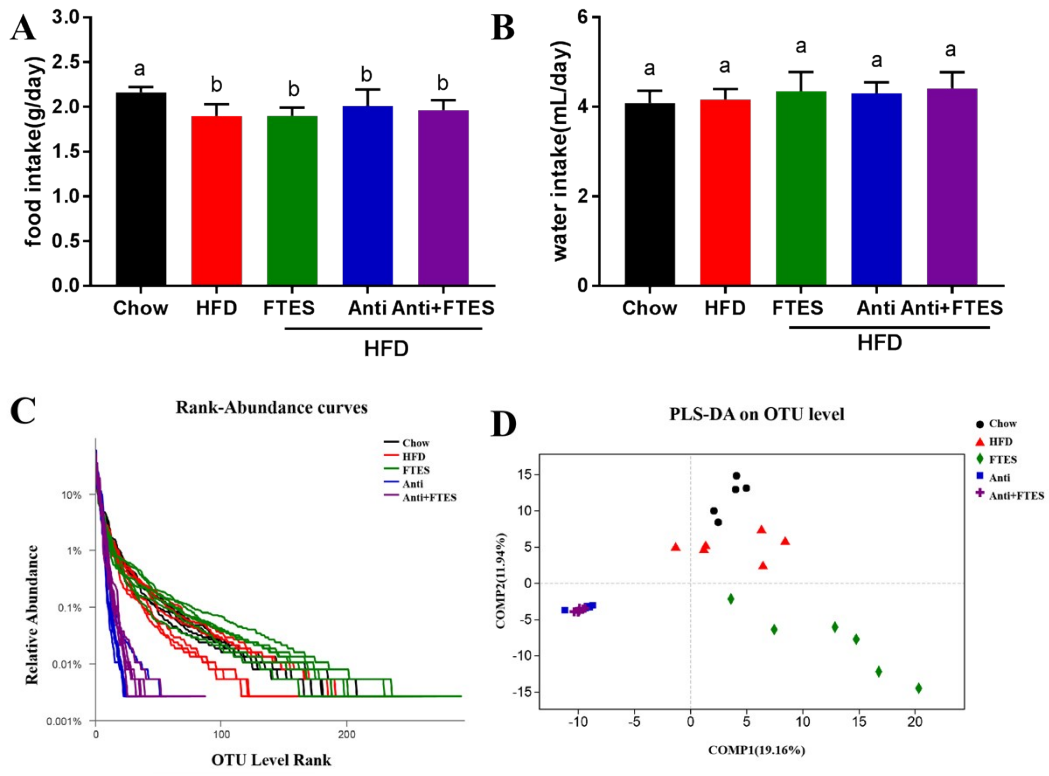



Figure S4.

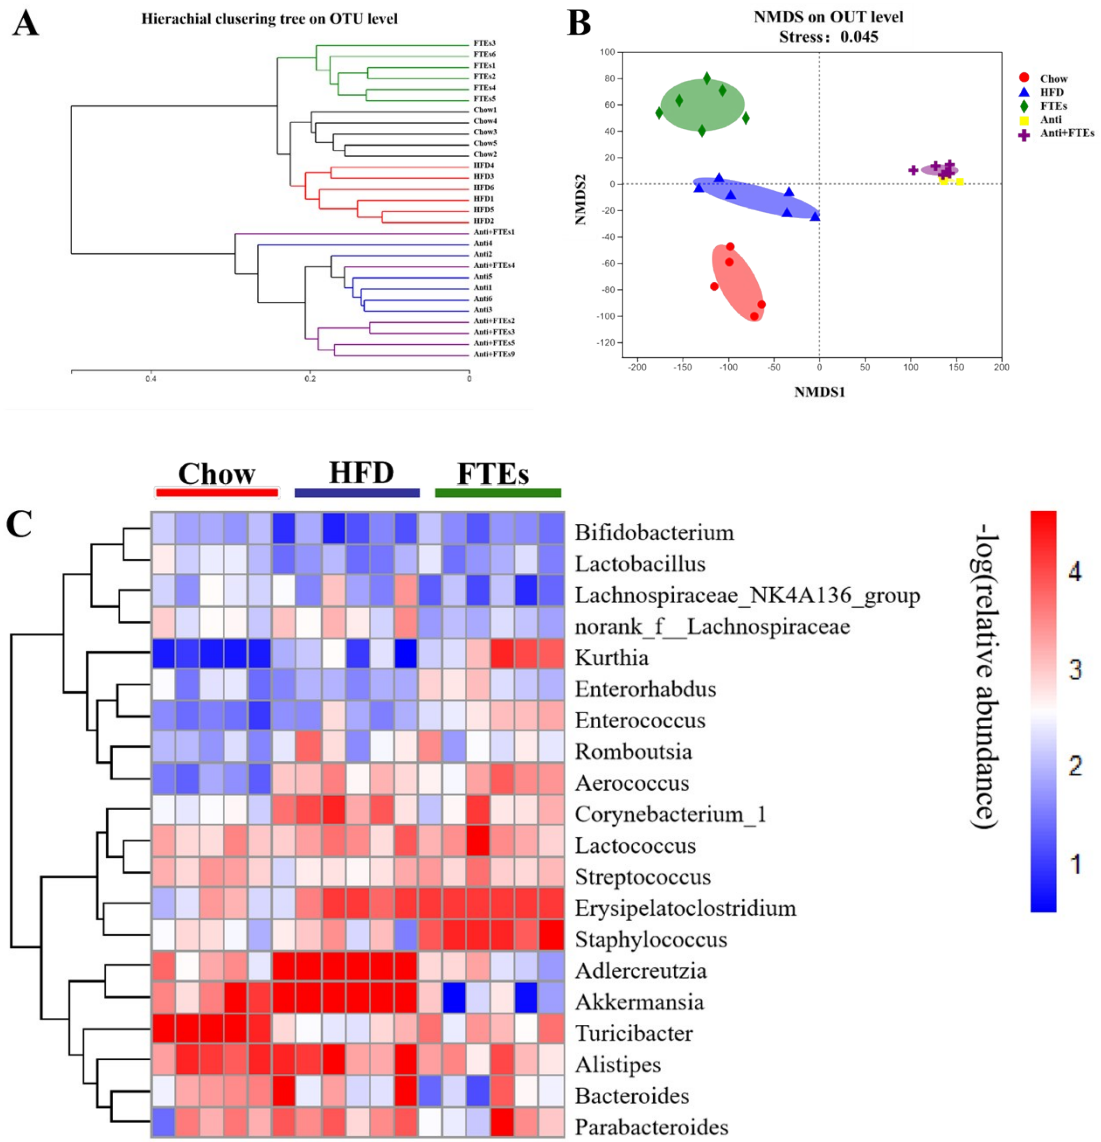

Figure S5.

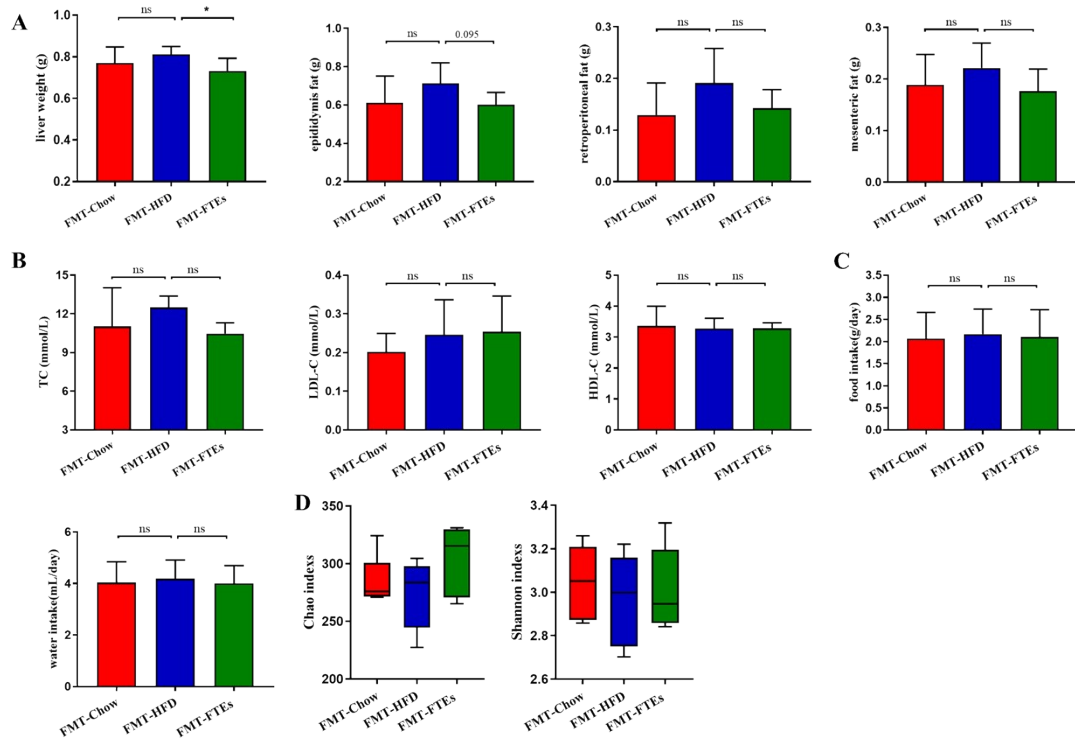

**Figure S6.**

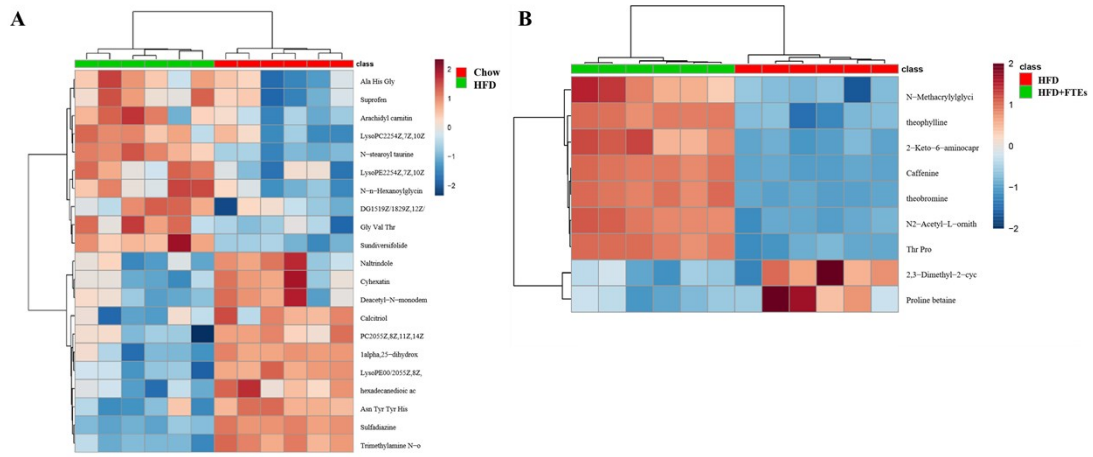

Figure S7

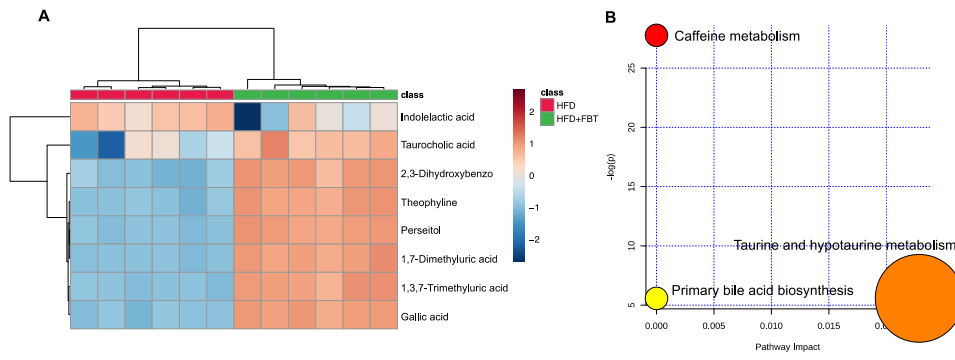

Supplement: d0fo01282c1.pdf [file d0fo01282c1.pdf]
